# Supplementary material for: Assessing Recent Smoking Status by Measuring Exhaled Carbon Monoxide Levels
Source: PubMed Central journal article supplement (PMC3241681; doi:10.1371/journal.pone.0028864), 2011-12-16
Supplement: pone.0028864.s004.pdf [file pone.0028864.s004.pdf]

**Table S1. Evaluation of individual cut-offs as predicted from the equation  $Y=Y_0-0.16x$  (derived from the averaged decline rate obtained from smokers with normal lung function, group 2).**

| <b>Cut-off: <math>Y=Y_0-0.159x+ 1</math> S.D.</b>                                   |     |
|-------------------------------------------------------------------------------------|-----|
| <b>Measurements classified using individualized cut-off (0-9hrs):</b>               |     |
| <b>True Negatives (TN; correctly classified using the equation)</b>                 | 58  |
| <b>False Positives (FP; miss-classified using the equation)</b>                     | 3   |
| <b>≤ 7 hrs measurements tested against individualized cut-off (value at 8 hrs):</b> |     |
| <b>True Positives (TP)</b>                                                          | 60  |
| <b>False Negatives (FN)</b>                                                         | 1   |
| <b>Sensitivity (TP/(TP+FN))</b>                                                     | 98% |
| <b>Specificity (TN/(TN+FP))</b>                                                     | 95% |

$Y_0$  for each individual was estimated by extrapolating the individual decay curve back to time 0. The derived equation plus one standard deviation was then used as cut-off.
